# Supplementary material for: Chiral discrimination of 2-arylalkanoic acids by (1S,2R)-1-aminoindan-2-ol through the formation of a consistent columnar supramolecular hydrogen-bond network †
Source: Royal Society of Chemistry journal article supplement (doi:10.1039/a905566e), 2000-01-01
Supplement: a905566e.doc [file a905566e.doc]

**Supplementary data**

**Chiral discrimination of 2-arylalkanoic acids by (1*S*,2*R*)-1-aminoindan-2-ol through the formation of a consistent columnar supramolecular hydrogen-bond network**

**Kazushi Kinbara, Yuka Kobayashi and Kazuhiko Saigo***

*Department of Chemistry and Biotechnology, Graduate School of Engineering, The University of Tokyo, Hongo, Bunkyo-ku, Tokyo 113-8656, Japan*

**Table S1** N···O and O···O distances in the diastereomeric salts of (1*S*,2*R*)-**2** with **3**–**7***a*

|  | N···O Distances (Å) | | |  | O···O Distance (Å) |
| --- | --- | --- | --- | --- | --- |
| Salt | A | B | C |  | D |
| (1*S*,2*R*)-**2**•(*R*)-**3a** | 2.729(5) | 2.666(8) | 2.856(8) |  | 2.657(5) |
| (1*S*,2*R*)-**2**•(*R*)-**3c** | 2.765(8) | 2.674(10) | 2.854(9) |  | 2.656(7) |
| (1*S*,2*R*)-**2**•(*R*)-**3e**•H2O | 2.796(5) | 2.683(6) | 2.812(7) |  | 2.675(6) |
| (1*S*,2*R*)-**2**•(*R*)-**4a** | 2.792(3) | 2.652(4) | 2.793(3) |  | 2.634(3) |
| (1*S*,2*R*)-**2**•(*S*)-**4a** | 2.799(5) | 2.685(7) | 2.770(6) |  | 2.714(3) |
| (1*S*,2*R*)-**2**•(*R*)-**4b** | 2.761(5) | 2.69(4) | 2.779(6) |  | 2.666(3) |
| (1*S*,2*R*)-**2**•(*S*)-**6** | 2.863(3) | 2.748(5) | 3.051(5) |  | 2.729(3) |
| (1*S*,2*R*)-**2**•(*S*)-**7** | 2.708(5) | 2.758(6) | 2.810(4) |  | 2.653(3) |

*a* Definitions of A–D are shown in Figures 3 and 4.

**Table S2** Stacking of aromatic rings along the columnar axis

|  | | | |
| --- | --- | --- | --- |
| Salt | *d*1 / Å | **(°) | |
|  |  | Ar(**2**) | Ar(**acid**) |
| (1*S*,2*R*)-**2•**(*R*)-**3a** | 6.32 | 27.8 | 13.1 |
| (1*S*,2*R*)-**2•**(*R*)-**3c** | 6.39 | 28.1 | 15.0 |
| (1*S*,2*R*)-**2•**(*R*)-**3e**•H2O | 6.18 | 21.5 | 19.2 |
| (1*S*,2*R*)-**2•**(*R*)-**4a** | 6.17 | 26.6 | 21.1 |
| (1*S*,2*R*)-**2•**(*R*)-**4b** | 6.14 | 24.2 | 17.2 |
| (1*S*,2*R*)-**2•**(*S*)-**6** | 5.79 | 34.0 | 30.6 |
| (1*S*,2*R*)-**2•**(*S*)-**7** | 6.34 | 31.4 | 24.3 |
| (1*S*,2*R*)-**2•**(*S*)-**4a** | 5.95 | 27.8 | 25.7 |

**Table S3** Intra- and inter-columnar positional parameters between the aromatic groups

|  | | | | | |
| --- | --- | --- | --- | --- | --- |
| Salt | Ar–Ar | *d*2 / Å | ** (°) | ** (°) | Inter/intra columns*a* |
| (1*S*,2*R*)-**2•**(*R*)-**3a** | Ar(**2**)•••Ar(**2**) | 4.95 | 22.1 | 55.6 | inter |
|  | Ar(**3a**)•••Ar(**3a**) | 4.74 | 33.5 | 26.1 | inter |
|  | Ar(**2**)•••Ar(**3a**) | 5.38 | 9.6 | 89.5 | inter |
| (1*S*,2*R*)-**2•**(*R*)-**3c** | Ar(**2**)•••Ar(**2**) | 4.94 | 21.5 | 56.1 | inter |
|  | Ar(**3c**)•••Ar(**3c**) | 5.25 | 32.1 | 30.1 | inter |
|  | Ar(**2**)•••Ar(**3c**) | 5.56 | 9.4 | 88.6 | inter |
| (1*S*,2*R*)-**2•**(*R*)-**3e**•H2O | Ar(**2**)•••Ar(**2**) | 4.81 | 23.6 | 53.0 | inter |
|  | Ar(**3e**)•••Ar(**3e**) | 5.68 | 24.6 | 38.8 | inter |
| (1*S*,2*R*)-**2•**(*R*)-**4a** | Ar(**2**)•••Ar(**2**) | 4.48 | 25.4 | 63.6 | inter |
|  | Ar(**4a**)•••Ar(**4a**) | 4.86 | 29.3 | 42.2 | inter |
|  | Ar(**2**)•••Ar(**4a**) | 5.50 | 9.2 | 82.2 | inter |
| (1*S*,2*R*)-**2•**(*R*)-**4b** | Ar(**4b**)•••Ar(**4b**) | 5.32 | 28.3 | 34.3 | inter |
|  | Ar(**2**)•••Ar(**4b**) | 4.97 | 29.2 | 89.2 | inter |
| (1*S*,2*R*)-**2•**(*S*)-**6** | Ar(**2**)---Ar(**6**) | 4.84 | 23.3 | 65.4 | intra |
|  | Ar(**6**)•••Ar(**6**) | 5.46 | 25.4 | 60.8 | inter |
| (1*S*,2*R*)-**2•**(*S*)-**7** | Ar(**2**)---Ar(**7**) | 4.86 | 25.7 | 58.9 | intra |
|  | Ar(**7**)•••Ar(**7**) | 4.71 | 23.7 | 48.6 | inter |
|  | Ar(**2**)•••Ar(**2**) | 5.72 | 17.8 | 63.0 | inter |
| (1*S*,2*R*)-**2•**(*S*)-**4a** | Ar(**2**)---Ar(**4a**) | 4.96 | 26.8 | 55.1 | intra |
|  | Ar(**4a**)•••Ar(**4a**) | 4.98 | 24.3 | 52.2 | inter |

*a* The CH••• interaction of Ar–Ar occurred within (intra) or between (inter) the columns.
